# Supplementary material for: Effects of Sulforaphane and 3,3′-Diindolylmethane on Genome-Wide Promoter Methylation in Normal Prostate Epithelial Cells and Prostate Cancer Cells
Source: PubMed Central journal article supplement (PMC3899342; doi:10.1371/journal.pone.0086787), 2014-01-22
Supplement: pone.0086787.s002.pdf [file pone.0086787.s002.pdf]

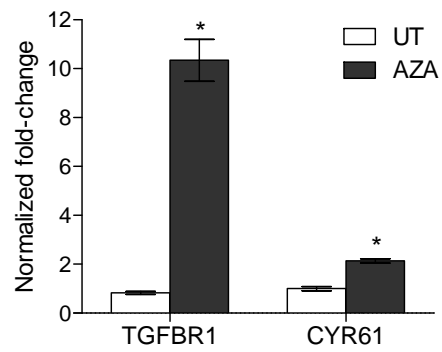

**Figure S2. AZA treatment resulted in the re-expression of methylation-silenced genes in LnCAP cells.** Relative gene expression of TGFBR1 and CYR61 in LnCAP cells left untreated (UT), or treated with 5 μM AZA for 48h (n=5 per group). Data represent mean normalized fold-change ± SEM compared to untreated control. \*p-value < 0.05.
