# Supplementary material for: Effects of Sulforaphane and 3,3′-Diindolylmethane on Genome-Wide Promoter Methylation in Normal Prostate Epithelial Cells and Prostate Cancer Cells
Source: PubMed Central journal article supplement (PMC3899342; doi:10.1371/journal.pone.0086787), 2014-01-22
Supplement: pone.0086787.s003.pdf [file pone.0086787.s003.pdf]

Table S1: Pyrosequencing primers

| Gene   | Forward primer            | Reverse primer (Biotinylated) | Sequencing primer         |
|--------|---------------------------|-------------------------------|---------------------------|
| CCR4   | TGAATTTAGTATAGTTGGGTGAGGG | AATCTATAAAACAATACCAAACCTACTCA | GGTGAGGGAGATAATT          |
| IL10   | TTTTGGGGAGAATAGTTGTTTTG   | CCCAATTATTTCTCAATCCCATTATAT   | GGGAGAATAGTTGTTTTGT       |
| ITGAL  | TGTAAGAGGTTAAAGGTATGATTAT | TCCCCTACCTCCTCCCTTA           | TTTGTTTAGGTTGTTAGTAAAT    |
| SMAD3  | GTGGGGTATTTGTTATTGAGAAGTA | CATACCTCAATCTCCTCATCTATAA     | TTTTTTTGGGTTTATTTTATTAGTA |
| TGFBR1 | AGGGAGGAGGGAGGTTATTT      | ACAACCCCAAACCCCTACATCCA       | TTGGGTTTGGGGTGA           |
| WNT5A  | AGTTGGGATGAGTTTAGGAATGGA  | CCCACATTTAAAATTA AAAAACC      | TAGGAATGGAGGGGG           |
